# Supplementary material for: Conservation and divergence of related neuronal lineages in the Drosophila central brain
Source: eLife. 2020 Apr 7;9:e53518. doi: 10.7554/eLife.53518 (PMC7173964; doi:10.7554/eLife.53518)
Supplement: Figure 13—source data 1. [file elife-53518-fig13-data1.xlsx]

## Sheet: AOTUv1_A_results
Name	TotalLength	LengthOfShortestPath	TotalLengthOfBraches(>=10um)	LengthOfShortestPath(>=10um)	TotalLengthOfBraches(>=25um)	LengthOfShortestPath(>=25um)	TotalLengthOfBraches(>=50um)	LengthOfShortestPath(>=50um)
H01(CRE)_2	24249.8	370.561	3239.84	440.519	1796.45	439.9	1128.68	439.023
P01(CRE)_3_modified	4978.58	321.341	1808.76	231.045	1140.31	231.045	731.161	231.245
P02(CRE)_4	9117.66	321.723	1766.01	260.765	1116.73	258.153	659.917	224.976
P03(CRE)_5	3326.23	268.578	897.322	266.187	592.577	262.917	494.279	218.528
P04(CRE)_6	1786.06	202.509	855.683	187.054	647.828	187.054	331.677	178.072
P05(LAL)_7	1253.27	227.626	617.713	231.879	386.251	215.119	213.032	213.032
P06(LAL)_8	4809.46	357.579	1453.55	289.276	1047.86	287.089	855.514	285.203
T01(LAL)_1_modified	14708.3	498.526	2845.6	366.414	1811.21	348.854	1238.74	330.966

## Sheet: AOTUv1_B_results
Name	TotalLength	LengthOfShortestPath	TotalLengthOfBraches(>=10um)	LengthOfShortestPath(>=10um)	TotalLengthOfBraches(>=25um)	LengthOfShortestPath(>=25um)	TotalLengthOfBraches(>=50um)	LengthOfShortestPath(>=50um)
P01(PS)_4	4167.64	436.119	909.498	197.618	594.711	197.668	495.587	197.668
P02(PS)_7	3464.05	290.771	879.952	259.689	576.968	259.689	547.792	259.689
P03(PS)_11	1916.99	292.05	647.611	271.81	516.089	271.037	304.117	237.022
P04(SAD)_9	1076.32	293.257	748.449	328.447	525.197	307.757	380.4	307.757
S01(PS)_1	5799.71	318.998	1372	294.362	899.896	292.523	579.444	292.523
S02(PS)_2	13318.7	469.645	2368.53	530.328	1405.74	527.553	949.642	526.749
S03(PS)_3	1392.89	260.388	857.602	255.334	569.362	236.064	262.72	219.165
S04(PS)_5	3661.67	377.836	1082.17	388.876	748.337	381.825	549.024	381.825
S05(PS)_6	1783.42	277.204	901.119	430.436	628.607	431.549	428.664	428.664
S06(PS)_8	3521.57	380.736	973.809	358.121	728.21	358.121	549.683	358.121
S07(PS)_10	6415.03	288.716	807.645	296.03	626.014	296.03	484.925	296.03
S08(PS)_12	1719.06	329.218	894.355	334.94	598.162	324.485	439.804	322.731
S09(PS)_13	5128.17	305.82	1050.43	332.133	756.342	329.886	586.55	315.615
S10(PS)_14	2054.59	328.856	961.392	310.367	557.804	309.49	365.174	305.684
S11(PS)_15	3312.91	311.234	751.121	297.766	629.036	297.3	297.469	297.469
S12(PS)_16	1645.09	452.697	696.866	239.071	469.827	239.071	237.318	237.318
S13(PS)_17	2757.95	270.187	975.956	281.801	730.274	281.801	293.383	242.973

## Sheet: AOTUv3_A_results
Name	TotalLength	LengthOfShortestPath	TotalLengthOfBraches(>=10um)	LengthOfShortestPath(>=10um)	TotalLengthOfBraches(>=25um)	LengthOfShortestPath(>=25um)	TotalLengthOfBraches(>=50um)	LengthOfShortestPath(>=50um)
H01(LAL)_1	2215.48	481.558	1300.41	356.908	992.465	351.881	640.337	343.735
H02(LAL)_7	3834.73	369.955	1027.82	353.158	596.431	352.3	484.798	350.414
H03(LAL)_8	1214.6	349.329	732.902	297.784	538.348	297.784	470.842	297.784
H04(LAL)_9	515.682	259.345	419.389	249.688	309.924	227.341	281.768	227.227
H05(LAL)_10	847.588	287.738	629.218	267.662	532.372	265.569	532.372	265.569
H06(LAL)_11	617.256	285.423	486.4	276.307	399.986	251.816	366.976	251.816
H07(LAL)_18	819.074	284.332	509.884	269.986	392.643	253.833	319.693	253.833
H08(LAL)_19	768.771	300.324	470.855	243.761	361.714	243.761	202.918	202.918
H09(LAL)_20	812.98	285.829	452.412	279.695	333.301	279.252	232.362	232.362
H10(PS)_2	4094.01	488.219	1335.75	423.525	1077.39	421.639	886.648	421.639
H11(PS)_5	835.223	418.308	641.519	356.403	609.228	356.403	479.376	356.403
H12(PS)_6	1197.2	489.932	882.943	395.833	710.368	395.367	561.884	396.923
H13(PS)_22	945.143	425.263	757.766	388.578	662.532	374.475	580.406	374.475
H14(PS)_4	4733.2	454.681	1183.16	347.671	864.278	347.671	619.885	347.671
H15(PLP)_3	1737.05	432.761	999.879	418.1	743.273	418.1	517.577	306.68
H16(ICLc)_16	948.262	435.417	694.22	480.771	600.305	480.771	491.225	480.771
H17(ICLc)_17	5676.14	429.36	1142.04	450.137	690.144	423.767	491.039	423.767
H18(SPSc)_21	2180.22	415.813	870.413	395.034	639.657	383.146	451.573	382.68
T01(PS)_12	1680.64	471.227	1105.15	408.344	839.516	406.787	777.949	406.787
T02(PS)_13	1511.6	548.332	934.817	401.868	726.44	400.628	670.801	315.332
T03(PS)_14	1593.16	491.622	985.697	398.398	781.69	398.398	630.96	398.398
T04(ICL)_15	1567.52	445.254	922.97	358.286	675.379	358.286	560.111	358.286

## Sheet: AOTUv3_B_results
Name	TotalLength	LengthOfShortestPath	TotalLengthOfBraches(>=10um)	LengthOfShortestPath(>=10um)	TotalLengthOfBraches(>=25um)	LengthOfShortestPath(>=25um)	TotalLengthOfBraches(>=50um)	LengthOfShortestPath(>=50um)
M01(LAL)_7	2654.14	397.438	1463.41	318.296	1100.47	317.222	679.86	287.549
M02(IB)_10	1472.06	299.912	856.186	303.462	507.936	303.823	444.038	303.823
M03(IB)_11	654.893	393.521	429.864	316.881	357.752	316.881	316.881	316.881
M04(IB)_12	1456.24	415.414	784.541	413.697	575.431	413.697	514.52	413.697
M05(IB)_13	4457.4	437.376	1135.8	418.449	939.238	418.449	731.581	416.563
M06(IB)_14	2288.75	334.601	1178.97	376.868	771.043	376.311	659.486	376.311
M07(IB)_15	1542.79	371.444	1081.16	337.03	831.528	317.596	654.75	317.596
P01(LAL)_1	848.521	241.861	545.373	271.641	282.481	256.858	219.558	219.558
P02(LAL)_2	4704.25	384.972	1074.91	401.919	762.029	401.043	501.002	364.942
P03(LAL)_3	8783.19	354.215	1541.43	370.337	938.758	367.622	710.854	367.622
P04(LAL)_4	4551.16	383.043	1956.74	510.402	1139.47	489.54	755.771	487.984
P05(LAL)_5	6402.46	1153	2001.89	295.896	1521.3	284.794	765.519	284.983
P06(LAL)_6	3037.88	320.009	1602.29	400.517	1219.25	401.693	910.638	400.817
P07(CRE)_8	197.924	108.144	156.077	107.677	72.748	72.748	72.748	72.748
P08(BU)_9	162.255	147.229	144.569	110.986	144.569	110.986	110.986	110.986

## Sheet: AOTUv4_A_results
Name	TotalLength	LengthOfShortestPath	TotalLengthOfBraches(>=10um)	LengthOfShortestPath(>=10um)	TotalLengthOfBraches(>=25um)	LengthOfShortestPath(>=25um)	TotalLengthOfBraches(>=50um)	LengthOfShortestPath(>=50um)
M01(FB)_3	1121.03	316.276	633.657	291.614	372.701	291.783	337.625	170.961
M02(FB)_4	1893.1	319.795	900.932	260.212	568.353	254.433	458.686	254.433
M03(FB)_5	4770.89	299.393	1865.27	318.172	1138.53	292.818	572.061	291.369
M04(FB)_6	3455.63	305.696	1714.8	310.314	1092.07	303.384	734.1	303.384
M05(FB)_7	2027.94	316.057	1428.76	257.965	941.57	257.965	773.383	254.287
M06(FB)_8	2409.45	300.326	1213.58	363.831	792.999	362.954	641.146	362.954
M07(FB)_9	6120.85	359.073	1518.43	374.517	1068.75	374.517	777.505	325.158
M08(FB)_10	2602.23	325.825	1240.21	338.429	653.449	311.502	524.635	311.502
M09(FB)_11	1883.56	256.463	973.119	356.71	706.654	341.897	432.425	305.741
M10(FB)_12	1467.17	321.525	802.206	270.947	623.978	267.693	326.777	220.437
M11(FB)_13	2601.52	283.787	1243.9	301.083	797.509	301.083	413.476	300.537
M12(FB)_14	1869.27	333.347	1111.72	263.714	815.085	262.591	462.42	224.774
M13(FB)_15	3178.46	335.292	1436.44	277.753	908.378	276.3	666.427	276.3
M14(FB)_16	6389.26	300.436	1773.48	438.422	750.914	439.952	616.161	437.836
M15(FB)_17	2014.9	259.105	1111.58	253.078	817.664	252.611	544.301	237.521
M16(FB)_18	2071.96	304.358	1182.95	227.7	750.125	212.402	438.773	200.961
M17(FB)_19	13392.8	375.117	2733.26	318.354	710.977	309.657	427.357	271.79
M18(FB)_20	1956.45	293.507	1191.57	315.115	716.253	315.94	525.232	314.733
P01(SP)_1	2417.55	244.005	988.995	303.706	595.577	302.181	432.064	302.181
P02(SP)_2	1545.9	315.346	876.579	295.07	589.513	295.45	563.726	295.45

## Sheet: AOTUv4_B_results
Name	TotalLength	LengthOfShortestPath	TotalLengthOfBraches(>=10um)	LengthOfShortestPath(>=10um)	TotalLengthOfBraches(>=25um)	LengthOfShortestPath(>=25um)	TotalLengthOfBraches(>=50um)	LengthOfShortestPath(>=50um)
H01(LAL)_5	1688.74	403.856	975.52	256.221	763.033	256.221	580.57	256.221
H02(LAL)_9	2142.46	372.302	934.959	287.227	556.411	283.568	498.172	283.568
H03(LAL)_10	2752.37	459.331	1103.21	304.292	772.545	304.292	684.656	304.292
H04(LAL)_11	3320.36	381.107	1794.06	423.592	1051.87	420.628	914.201	383.818
H06(CRE)_12	5714.12	468.433	1528.14	377.886	1131.42	370.934	979.51	370.17
H07(CRE)_13	2976.2	382.488	1626.18	354.083	1017.15	350.853	737.044	320.557
H08(CRE)_14	1445.39	387.196	974.943	415.554	704.532	410.31	515.932	362.413
H09(CRE)_15	1708.81	469.547	1036.61	315.226	844.754	313.34	767.557	313.34
H10(CRE)_16	1091.59	385.103	706.473	346.396	538.787	346.396	510.094	346.396
P01(CRE)_1	2131.89	272.631	1397.6	300.637	786.438	296.527	416.816	269.757
P02(CRE)_2	1500.4	280.956	1114.16	254.55	602.321	239.591	532.697	237.838
P03(CRE)_3	1814.23	273.938	949.479	329.659	678.613	325.909	541.083	284.518
P04(BU)_4	282.2	120.448	147.49	114.604	147.49	114.604	71.101	71.101
T01(VES)_7	2414.01	407.223	1303.74	383.819	880.625	383.797	692.467	383.797
T02(VES)_8	853.248	418.53	647.256	330.767	471.432	312.944	445.457	312.944
T03(CRE)_17	1002.45	409.247	626.73	330.308	504.187	328.421	407.76	328.421

## Sheet: CREa1_A_results
Name	TotalLength	LengthOfShortestPath	TotalLengthOfBraches(>=10um)	LengthOfShortestPath(>=10um)	TotalLengthOfBraches(>=25um)	LengthOfShortestPath(>=25um)	TotalLengthOfBraches(>=50um)	LengthOfShortestPath(>=50um)
H01(a1)_3	3298.99	678.427	964.919	381.443	718.48	381.856	718.48	381.856
H02(b1ped)_4	3438.32	480.567	1257.73	326.845	966.536	310.615	886.686	310.615
H03(b1)_5	12358.2	375.018	1743.82	270.032	866.844	268.556	694.095	264.322
H04(b2)_6	9782.45	372.996	1556.23	311.114	1066.08	311.114	877.726	278.78
H05(b2)_7	16599.9	660.329	1352.42	314.56	794.081	312.207	686.261	312.207
H06(r5)_8	4199.93	463.603	821.755	237.669	662.416	236.193	493.768	198.937
H07(b'2r5)_9	1972.77	233.814	917.923	219.599	663.301	215.053	377.668	215.053
H08(b'2a)_10	1890.92	249.009	687.832	231.947	534.104	230.813	230.813	230.813
H09(b'2m)_11	1540.91	235.723	538.367	212.463	288.223	210.463	210.463	210.463
H10(r4)_12	4442.62	307.671	1173.38	229.503	857.8	230.146	516.799	229.006
H11(b'2p)_13	6641.5	253.132	1444.44	366.342	943.541	365.569	536.447	365.022
H12(b'2m)_14	4871.58	290.312	1004.28	222.404	584.525	222.788	433.319	222.788
H13(b'1m)_15	2062.74	300.431	791.742	269.37	649.201	269.37	396.955	220.65
H14(b'1ap)_16	3677.15	281.874	861.726	289.667	616.805	286.984	464.592	286.984
H15(r3)_17	2514.27	421.858	1088.57	331.442	737.653	324.578	496.476	276.918
H16(r4)_18	3953.76	262.724	838.371	251.516	632.626	248.856	505.18	248.887
H17(r4_r2)_19	3984.59	232.241	1021.79	228.323	581.033	245.567	434.796	246.034
H18(r4_r1r2)_20	1489	243.257	865.329	181.089	590.548	178.924	441.537	178.924
H19(r4_5)_21	2715.18	226.302	662.683	230.124	434.629	215.564	380.801	215.564
H20(r5)_22	2714.86	269.656	883.511	213.406	752.238	211.426	378.705	209.87
H21(b'2m)_23	1970.63	213.749	790.66	186.592	592.727	186.592	330.528	186.592
H22(b2)_24	3385.53	505.63	626.127	179.886	433.374	175.649	353.667	173.763
H23(b2b'2)_25	2134.32	228.269	816.777	216.445	552.492	197.515	357.857	188.548
M01(FB)_2	1606.88	454.956	936.377	310.707	641.163	304.835	532.142	258.691
T01(IB)_1	8615.52	439.855	1237.25	352.829	835.53	352.829	570.17	352.829

## Sheet: CREa1_B_results
Name	TotalLength	LengthOfShortestPath	TotalLengthOfBraches(>=10um)	LengthOfShortestPath(>=10um)	TotalLengthOfBraches(>=25um)	LengthOfShortestPath(>=25um)	TotalLengthOfBraches(>=50um)	LengthOfShortestPath(>=50um)
H01(_SLPc)_9	2407.8	521.481	1091.47	412.974	811.311	389.637	594.91	249.575
P01(LO)_1	21321.3	738.315	5981.93	629.916	3949.99	623.629	2546.55	621.979
P02(VLP)_2	29930.1	563.654	5236.32	555.565	3563.05	555.712	2271.11	556.282
P03(VLP)_3	18395	695.675	3138.82	708.254	2095.54	708.254	1365.33	706.5
P04(LH)_4	19300.4	4827.3	3623.44	534.107	2529.75	533.829	1815.18	533.829
P05(SLP)_5	3242.8	659.063	1562.04	555.125	1134.74	555.125	926.146	555.125
P06(SLP)_6	7510.4	456.789	1420.82	477.004	1022.02	477.004	857.215	477.004
P07(SLP)_7	3355.41	473.158	1177.5	459.04	894.688	457.287	547.735	422.78
P08(SLP)_8	1695.97	415.459	785.717	405.001	623.434	405.001	582.226	405.001

## Sheet: CREa2_A_results
Name	TotalLength	LengthOfShortestPath	TotalLengthOfBraches(>=10um)	LengthOfShortestPath(>=10um)	TotalLengthOfBraches(>=25um)	LengthOfShortestPath(>=25um)	TotalLengthOfBraches(>=50um)	LengthOfShortestPath(>=50um)
H01(a1)_2	2055.54	528.261	1273.54	350.509	987.834	347.169	744.832	301.579
H02(b1ped)_3	2274.94	435.88	1361.47	314.945	1001.21	314.945	843.089	314.945
H03(b1)_4	2726.19	659.546	1434.91	291.034	987.912	288.001	760.874	288.001
H04(b2)_5	2348.88	348.135	1300.06	259.55	810.217	247.465	458.205	244.805
H05(b2)_6	3785.49	313.051	1367.8	203.748	717.83	198.695	535.445	198.388
H06(r5)_7	1518.07	239.673	724.393	191.311	447.599	188.548	376.112	188.548
H07(b'2r5)_8	1636.9	222.421	806.848	201.822	574.773	201.822	243.018	137.581
H08(b'2a)_9	1053.28	263.551	560.02	182.605	343.507	182.824	235.369	182.824
H09(b'2m)_10	1074.93	240.243	465.508	169.028	214.135	167.575	166.335	166.335
H10(r4)_11	2167.62	386.16	908.968	253.261	600.971	253.934	436.143	251.821
H11(b'2p)_12	1779.04	201.94	991.725	222.583	618.309	221.254	351.943	220.697
H12(b'2m)_13	2083.06	247.278	1123.02	216.788	536.519	197.828	344.296	197.828
H13(b'1m)_14	1080.4	275.079	654.893	213.367	473.365	213.367	473.365	213.367
H14(b'1ap)_15	1258.31	238.601	800.15	188.909	572.007	188.909	275.05	188.909
H15(r3)_16	1675.77	291.902	960.486	253.634	667.429	254.318	364.626	254.318
H16(r4)_17	1684.22	241.651	847.516	252.21	544.591	237.46	332.886	235.89
H17(r4_r2)_18	1195.07	240.239	734.237	297.94	621.853	298.713	441.163	298.713
H18(r4_r1r2)_19	1526.02	261.76	804.916	201.975	509.905	201.975	474.419	201.975
H19(r4_5)_20	1266.81	239.608	801.969	221.085	563.562	220.618	423.931	186.359
H20(r5)_21	1286.59	226.587	765.191	182.802	460.79	173.874	273.408	173.874
H21(b'2m)_22	1112.48	219.326	643.794	209.191	435.764	209.191	402.678	209.191
H22(b2)_23	822.949	239.221	564.523	166.675	420.053	166.675	341.183	166.675
H23(b2b'2)_24	1341.68	216.479	693.356	164.264	370.928	161.526	161.526	161.526
M01(FB)_1	2455.59	356.631	1064.78	439.886	800.384	439.255	634.47	439.255

## Sheet: CREa2_B_results
Name	TotalLength	LengthOfShortestPath	TotalLengthOfBraches(>=10um)	LengthOfShortestPath(>=10um)	TotalLengthOfBraches(>=25um)	LengthOfShortestPath(>=25um)	TotalLengthOfBraches(>=50um)	LengthOfShortestPath(>=50um)
P01(PS)_1	3059.18	370.945	1875.8	399.713	979.938	397.826	778.019	397.826
P02(PS)_3	1501.94	350.904	978.195	309.523	475.22	294.196	386.547	294.196
P03(PS)_4	1550.63	386.548	1051.37	358.539	771.503	356.17	474.165	355.703
P04(PS)_5	758.818	261.184	504.131	211.155	336.055	207.618	251.323	207.618
P05(PS)_6	1105.77	309.624	736.827	274.294	564.219	274.294	350.078	274.294
P06(PS)_7	1274.28	309.194	794.072	255.589	587.731	255.589	541.978	255.589
P07(PS)_8	2453.91	307.842	1477.12	344.273	1102.98	345.15	592.302	345.15
P08(PS)_9	3266.02	382.554	1956.05	380.345	1275.17	383.005	834.981	382.642
P09(PS)_10	2784.84	458.733	1703.18	404.717	1241.39	405.279	826.871	401.939
P10(PS)_11	2426.1	491.824	1524.12	381.445	1166.62	378.768	721.965	378.542
P11(PS)_12	1837.81	401.046	1251.97	428.582	814.883	426.932	731.68	426.932
P12(LAL)_2	1778.13	262.13	1089.37	285.192	763.795	283.715	559.396	283.715
P13(LAL)_13	1312.37	262.515	708.602	252.604	452.243	250.185	250.185	250.185
P14(LAL)_14	1018.52	250.595	679.944	201.989	404.94	201.661	290.2	201.661
P15(LAL)_15	2476.7	364.098	1303.45	432.182	860.199	427.748	489.119	425.862
P16(LAL)_16	1161.17	284.978	796.739	260.237	519.468	255.967	410.629	255.967
P17(LAL)_17	701.208	252.361	485.857	205.885	319.644	180.351	283.141	180.351
P18(CRE)_18	1253.21	178.116	701.106	224.711	516.141	224.711	223.937	223.937

[truncated: 5 more sheets: LALv1_A_results, LALv1_B_results, SMPp&v1_A_results, SMPp&v1_B_results, Sheet1]
