# Supplementary material for: Conservation and divergence of related neuronal lineages in the Drosophila central brain
Source: eLife. 2020 Apr 7;9:e53518. doi: 10.7554/eLife.53518 (PMC7173964; doi:10.7554/eLife.53518)
Supplement: Supplementary file 1. [file elife-53518-supp1.xlsx]

## Sheet: ALv1_type
	18 ALH	20 ALH	22 ALH	24 ALH	26 ALH	28 ALH	30 ALH	32 ALH	34 ALH	36 ALH	38 ALH	40 ALH	42 ALH	44 ALH	46 ALH	48 ALH	50 ALH	52 ALH	54 ALH	56 ALH	58 ALH	60 ALH	62 ALH	64 ALH	66 ALH	68 ALH	70 ALH	72 ALH	74 ALH	76 ALH	78 ALH	80 ALH	82 ALH	84 ALH	22 BPF	20 BPF	18 BPF	16 BPF	14 BPF	12 BPF	10 BPF	8 BPF	6 BPF	4 BPF	2 BPF	0 BPF	0 APF	2 APF	4 APF
P01(SEG)	0	0	0	0	0	0	2	4	5	3	2	1	0	0	0	1	0	0	0	0	0	0	0	0	0	0	0	0	0	0	0	0	0	0	0	0	0	0	0	0	0	0	0	0	0	0	0	0	0
P02(DA1)	0	0	0	0	0	0	0	0	0	1	2	1	3	0	0	3	0	0	0	0	0	0	0	1	0	0	0	0	0	0	0	0	0	0	0	0	0	0	0	0	0	0	0	0	0	0	0	0	0
P03(VL1)	0	0	0	0	0	0	0	0	0	0	0	1	5	1	0	0	1	0	0	0	0	0	0	0	0	0	0	0	0	0	0	0	0	0	0	0	0	0	0	0	0	0	0	0	0	0	0	0	0
P04(VA1lm)	0	0	0	0	0	0	0	0	0	0	0	0	0	3	0	1	1	0	1	0	0	0	0	0	0	0	0	0	0	0	0	1	0	0	0	0	0	0	0	0	0	0	0	0	0	0	0	0	0
P05(VA1d)	0	0	0	0	0	0	0	0	0	0	0	0	0	0	1	3	1	2	3	0	0	0	0	0	0	0	0	0	0	0	0	0	0	0	0	0	0	0	0	0	0	0	0	0	0	0	0	0	0
P06(DM1,4)	0	0	0	0	0	0	0	0	0	0	0	0	0	0	0	0	0	0	0	0	0	0	0	0	0	0	1	5	4	2	2	0	1	0	0	0	0	0	0	0	0	0	0	0	0	0	0	0	0
P07(DL2d)	0	0	0	0	0	0	0	0	0	0	0	0	0	0	0	0	0	0	0	0	0	0	0	0	0	0	0	0	0	1	1	0	0	1	0	0	0	0	0	0	0	0	0	0	0	0	0	0	0
P08(VL2p)	0	0	0	0	0	0	0	0	0	0	0	0	0	0	0	0	0	0	0	0	0	0	0	0	0	0	0	0	0	0	1	5	2	6	1	1	0	0	0	0	0	0	0	0	0	0	0	0	0
P09(DP1l,VL2p)	0	0	0	0	0	0	0	0	0	0	0	0	0	0	0	0	0	0	0	0	0	0	0	0	0	0	0	0	0	0	1	1	2	4	0	1	0	0	0	0	0	0	0	0	0	0	0	0	0
P10(v)	0	0	0	0	0	0	0	0	3	2	1	2	0	0	0	2	0	0	0	0	0	0	0	0	0	0	0	0	0	0	0	0	0	0	0	0	0	0	0	0	0	0	0	0	0	0	0	0	0
P11(a)	0	0	0	0	0	0	0	0	0	0	0	0	0	0	0	2	1	2	0	0	1	0	0	0	0	0	0	0	0	0	0	0	0	0	0	0	0	0	0	0	0	0	0	0	0	0	0	0	0
P12(a)	0	0	0	0	0	0	0	0	0	0	0	0	0	0	0	0	5	3	4	2	0	0	0	0	0	0	0	0	0	0	0	0	0	0	0	0	0	0	0	0	0	0	0	0	0	0	0	0	0
P13(dp,va)	0	0	0	0	0	0	0	0	0	0	0	0	0	0	0	0	1	0	1	2	1	1	0	0	0	0	0	0	0	1	0	0	0	0	0	0	0	0	0	0	0	0	0	0	0	0	0	0	0
P14(p)	0	0	0	0	0	0	0	0	0	0	2	0	0	0	0	1	0	0	0	0	0	0	0	0	1	0	0	0	0	0	1	0	0	0	0	0	0	0	0	0	0	0	0	0	0	0	0	0	0
P15(p)	1	1	0	0	0	0	0	0	0	0	0	0	0	0	0	0	1	1	0	0	0	0	0	0	0	0	0	0	0	0	0	0	0	0	0	0	0	0	0	0	0	0	0	0	0	0	0	0	0
P16(a)	0	0	0	0	0	0	0	0	0	0	0	0	0	0	0	0	0	0	1	1	1	0	1	0	0	0	0	0	0	0	0	0	0	0	0	1	0	0	0	0	0	0	0	0	0	0	0	0	0
P17(p)	0	0	0	0	0	0	0	0	0	0	0	0	0	0	0	0	1	0	1	6	2	2	1	2	0	0	0	0	0	0	0	0	0	0	0	0	0	0	0	0	0	0	0	0	0	0	0	0	0
P18(da)	0	0	0	1	0	0	0	0	0	0	0	0	0	0	0	0	0	0	0	2	3	3	3	0	1	0	0	0	0	0	0	0	0	0	0	0	0	0	0	0	0	0	0	0	0	0	0	0	0
P19(v)	0	0	0	0	0	0	0	0	0	0	0	0	0	0	0	0	0	0	0	0	0	2	4	3	1	0	0	1	0	0	1	0	0	0	0	0	0	0	0	0	0	0	0	0	0	0	0	0	0
P20(dp)	0	0	0	0	0	0	0	0	0	0	0	0	0	0	0	0	0	0	0	0	0	0	0	1	2	1	4	2	1	0	0	0	0	0	0	0	0	0	0	0	0	0	0	0	0	0	0	0	0
P21(d)	0	0	0	0	0	0	0	0	0	0	0	0	0	0	0	0	0	0	0	0	0	0	0	0	3	1	2	3	0	2	0	0	0	0	0	0	0	0	0	0	0	0	0	0	0	0	0	0	0
P22(d)	0	0	0	0	0	0	0	0	0	0	0	0	0	0	0	0	0	0	0	0	0	0	0	1	1	2	9	1	2	0	0	0	0	0	0	0	0	0	0	0	0	0	0	0	0	0	0	0	0
P23(dp)	0	0	0	0	0	0	0	0	0	0	0	0	0	0	0	0	0	0	0	0	0	0	0	0	0	0	0	1	0	0	0	0	0	0	0	0	0	0	0	0	0	0	0	0	0	0	0	0	0
P24(dp)	0	0	0	0	0	0	0	0	0	0	0	0	0	0	0	0	0	0	0	0	0	0	0	0	0	0	1	1	9	4	2	1	1	1	0	0	0	0	0	0	0	0	0	0	0	0	0	0	0
P25(dp)	0	0	0	0	0	0	0	0	0	0	0	0	0	0	0	1	0	0	0	0	0	0	0	0	0	0	0	1	6	11	6	3	2	1	0	1	0	0	0	0	0	1	0	0	0	0	0	0	0
P26(da)	0	0	0	0	0	0	0	0	0	0	0	0	0	0	0	0	0	0	0	0	0	0	1	0	0	0	0	0	0	0	0	0	0	2	0	0	1	0	0	0	0	0	0	0	0	0	0	0	0
P27(da)	0	0	0	0	0	0	0	0	0	0	0	0	0	0	0	0	0	0	0	0	0	0	0	0	0	1	0	0	0	0	0	0	0	2	0	0	0	0	0	0	0	0	0	0	0	0	0	0	0
P28(da)	0	0	0	0	0	0	0	0	0	0	0	0	0	0	0	0	0	0	0	0	0	0	0	0	0	0	0	0	0	0	0	0	0	1	0	0	0	0	0	0	0	0	0	0	0	0	0	0	0
P29(vp)	0	0	0	0	0	0	0	0	0	0	0	0	0	0	0	0	0	0	0	0	0	0	0	0	0	0	0	0	0	0	0	0	0	2	0	0	0	1	0	0	0	0	0	0	0	0	0	0	0
P30(vp,d)	0	0	0	0	0	0	0	0	0	0	0	0	0	0	0	0	0	0	0	0	0	0	0	0	0	0	0	0	0	0	0	1	0	2	1	0	3	0	1	0	0	1	0	0	0	0	0	0	0
P31(a)	0	0	0	0	0	0	0	0	0	0	0	0	0	0	0	0	0	0	0	0	0	0	0	0	0	1	0	0	0	0	0	0	0	2	3	2	1	2	2	5	0	3	0	0	0	0	0	0	0
P32(da)	0	0	0	0	0	0	0	0	0	0	0	0	0	0	0	0	0	0	0	0	0	0	0	0	0	0	0	0	0	0	0	0	0	0	1	1	0	3	0	2	1	3	0	2	0	0	0	0	0
P33(d)	0	0	0	0	0	0	0	0	0	0	0	0	0	0	0	0	0	0	0	0	0	0	0	0	0	0	0	0	0	0	0	0	0	0	0	1	5	8	6	6	3	6	5	0	2	0	0	0	0
P34(v)	0	0	0	0	0	0	0	0	0	1	0	0	0	0	0	0	0	0	0	0	0	0	0	0	0	0	0	0	0	0	0	0	0	0	0	0	0	0	0	1	3	0	1	1	0	0	0	0	0
P35(p)	0	0	0	0	0	0	0	0	0	0	0	0	0	0	0	0	0	0	0	0	0	0	0	0	0	0	0	0	0	0	0	0	0	0	0	2	2	9	14	19	20	16	21	24	20	26	7	3	4
P36(a)	0	0	0	0	0	0	0	0	0	0	0	0	0	0	0	0	0	0	0	0	0	0	0	0	0	0	0	0	0	0	0	0	0	0	0	0	0	0	0	0	1	0	1	1	1	0	0	0	0
P37(vp)	0	0	0	0	0	0	0	0	0	0	0	0	0	0	0	0	0	0	0	0	0	0	0	0	0	0	0	0	0	0	1	0	0	0	0	0	1	0	5	5	0	3	7	9	10	9	7	2	3
P38(p)	0	0	0	0	0	0	0	0	0	0	0	0	0	0	0	0	0	0	0	0	0	0	0	0	0	0	0	1	0	0	0	0	0	0	0	1	0	0	0	0	0	0	3	7	6	11	9	16	14
P39(v)	0	0	0	1	0	0	0	0	0	0	0	1	0	0	0	0	0	0	0	0	0	0	0	1	0	0	0	0	0	0	0	0	0	0	0	0	0	0	1	0	0	1	0	0	0	2	4	10	8
P40(v)	0	0	0	0	0	0	0	0	0	0	0	0	0	0	0	0	0	0	0	0	1	0	0	0	0	0	1	0	0	0	0	0	1	0	0	1	0	0	0	0	0	1	4	0	0	0	2	6	17
P41(p)	0	0	0	0	0	0	0	0	0	0	0	0	0	0	0	0	0	0	0	0	0	0	0	0	0	0	0	0	0	0	0	0	0	0	0	0	0	0	0	0	0	0	0	0	0	0	0	0	0
P42(d)	0	0	0	0	0	0	0	0	0	0	0	0	0	0	0	0	0	0	0	0	0	0	0	0	0	0	0	0	0	0	0	0	0	0	0	0	0	0	0	0	0	0	0	0	0	1	0	0	1
P43(SMP)	0	0	0	0	0	0	0	0	0	0	0	2	0	4	3	4	0	1	0	0	0	0	0	0	0	0	0	0	0	0	0	0	0	0	0	0	0	0	0	0	0	0	0	0	0	0	0	0	0
P44(SLP)	0	0	0	0	0	0	0	0	0	0	0	0	0	0	0	0	0	0	0	0	0	0	0	0	3	7	8	8	6	4	1	0	0	0	0	0	0	0	0	0	0	0	0	0	0	1	0	0	0
P45(SEG)	0	0	0	0	0	0	0	0	0	0	0	0	0	0	0	0	0	0	0	0	0	0	0	0	0	0	0	0	0	0	1	1	0	0	0	0	0	0	0	0	0	0	0	0	0	0	0	0	0
P46(calyx)	0	0	0	0	0	0	0	0	0	0	0	0	0	0	0	0	0	0	0	0	0	0	0	0	0	0	0	0	0	0	0	0	0	0	0	0	0	1	0	0	1	0	0	0	0	0	0	0	0
[truncated: 6 more columns]

## Sheet: ALv1_group
	18 ALH	20 ALH	22 ALH	24 ALH	26 ALH	28 ALH	30 ALH	32 ALH	34 ALH	36 ALH	38 ALH	40 ALH	42 ALH	44 ALH	46 ALH	48 ALH	50 ALH	52 ALH	54 ALH	56 ALH	58 ALH	60 ALH	62 ALH	64 ALH	66 ALH	68 ALH	70 ALH	72 ALH	74 ALH	76 ALH	78 ALH	80 ALH	82 ALH	84 ALH	22 BPF	20 BPF	18 BPF	16 BPF	14 BPF	12 BPF	10 BPF	8 BPF	6 BPF	4 BPF	2 BPF	0 BPF	0 APF	2 APF	4 APF
AL	1	1	0	2	0	0	0	0	3	4	5	7	8	8	4	17	12	9	11	13	9	8	10	9	12	13	26	24	28	25	18	13	9	24	6	12	13	24	29	38	29	35	42	44	39	50	29	37	47
SEG	0	0	0	0	0	0	2	4	5	3	2	1	0	0	0	1	0	0	0	0	0	0	0	0	0	0	0	0	0	0	0	0	0	0	0	0	0	0	0	0	0	0	0	0	0	0	0	0	0
[truncated: 6 more columns]

## Sheet: AOTUv1A_type
	18 ALH	20 ALH	22 ALH	24 ALH	26 ALH	28 ALH	30 ALH	32 ALH	34 ALH	36 ALH	38 ALH	40 ALH	42 ALH	44 ALH	46 ALH	48 ALH	50 ALH	52 ALH	54 ALH	56 ALH	58 ALH	60 ALH	62 ALH	64 ALH	66 ALH	68 ALH	70 ALH	72 ALH	74 ALH	76 ALH	78 ALH	80 ALH	82 ALH	84 ALH	22 BPF	20 BPF	18 BPF	16 BPF	14 BPF	12 BPF	10 BPF	8 BPF	6 BPF	4 BPF	2 BPF	0 BPF	0 APF	2 APF	4 APF
H01(CRE)	0	0	0	0	0	0	0	0	0	0	1	0	7	4	2	5	0	2	0	1	1	0	0	0	0	0	0	0	0	0	0	0	0	0	0	0	0	0	0	0	0	0	0	0	0	1	0	0	0
P01(CRE)	0	0	1	0	0	0	0	0	0	0	0	1	3	0	2	1	1	2	1	0	1	0	0	0	0	0	0	0	0	0	0	0	0	0	0	0	0	0	0	0	0	0	0	0	0	0	0	0	0
P02(CRE)	0	0	0	0	0	0	0	0	0	0	1	2	7	7	2	3	2	3	1	5	1	0	0	0	0	0	0	0	0	0	1	0	0	0	0	0	0	0	0	0	0	0	0	0	0	0	0	0	0
P03(CRE)	0	0	0	0	0	0	0	0	0	0	0	0	0	0	0	0	3	3	0	1	0	0	0	0	0	0	0	0	0	0	0	0	0	0	0	0	0	0	0	0	0	0	0	0	0	0	0	0	0
P04(CRE)	0	0	0	0	0	0	0	0	0	0	0	0	0	0	0	0	3	2	8	8	6	1	5	1	1	0	0	0	0	0	1	0	0	0	0	0	0	0	2	0	0	0	0	0	0	0	0	0	0
P05(LAL)	0	0	0	0	0	0	0	1	0	0	0	0	0	0	0	0	1	0	1	6	5	0	5	1	1	0	0	0	0	0	0	0	0	0	0	0	0	1	0	0	0	0	0	0	0	0	0	0	0
P06(LAL)	0	0	0	0	0	0	0	0	0	0	0	0	0	0	1	0	1	0	3	3	3	10	8	2	1	0	0	1	0	0	0	0	0	0	0	0	0	0	1	1	0	0	0	0	0	0	0	0	0
T01(LAL)	0	0	0	0	0	0	1	3	5	2	8	6	6	8	2	4	2	0	2	2	1	0	0	0	0	0	0	0	0	0	0	0	0	0	0	0	0	0	0	0	0	0	0	1	0	0	0	0	0
[truncated: 6 more columns]

## Sheet: AOTUv1A_group
	18 ALH	20 ALH	22 ALH	24 ALH	26 ALH	28 ALH	30 ALH	32 ALH	34 ALH	36 ALH	38 ALH	40 ALH	42 ALH	44 ALH	46 ALH	48 ALH	50 ALH	52 ALH	54 ALH	56 ALH	58 ALH	60 ALH	62 ALH	64 ALH	66 ALH	68 ALH	70 ALH	72 ALH	74 ALH	76 ALH	78 ALH	80 ALH	82 ALH	84 ALH	22 BPF	20 BPF	18 BPF	16 BPF	14 BPF	12 BPF	10 BPF	8 BPF	6 BPF	4 BPF	2 BPF	0 BPF	0 APF	2 APF	4 APF
AOTU	0	0	1	0	0	0	1	3	5	2	10	9	23	19	8	13	5	7	4	8	4	0	0	0	0	0	0	0	0	0	1	0	0	0	0	0	0	0	0	0	0	0	0	1	0	1	0	0	0
CRE	0	0	0	0	0	0	0	0	0	0	0	0	0	0	0	0	6	5	8	9	6	1	5	1	1	0	0	0	0	0	1	0	0	0	0	0	0	0	2	0	0	0	0	0	0	0	0	0	0
LAL	0	0	0	0	0	0	0	1	0	0	0	0	0	0	1	0	2	0	4	9	8	10	13	3	2	0	0	1	0	0	0	0	0	0	0	0	0	1	1	1	0	0	0	0	0	0	0	0	0
[truncated: 6 more columns]

## Sheet: AOTUv1B_type
	18 ALH	20 ALH	22 ALH	24 ALH	26 ALH	28 ALH	30 ALH	32 ALH	34 ALH	36 ALH	38 ALH	40 ALH	42 ALH	44 ALH	46 ALH	48 ALH	50 ALH	52 ALH	54 ALH	56 ALH	58 ALH	60 ALH	62 ALH	64 ALH	66 ALH	68 ALH	70 ALH	72 ALH	74 ALH	76 ALH	78 ALH	80 ALH	82 ALH	84 ALH	22 BPF	20 BPF	18 BPF	16 BPF	14 BPF	12 BPF	10 BPF	8 BPF	6 BPF	4 BPF	2 BPF	0 BPF	0 APF	2 APF	4 APF
P01(PS)	0	0	0	0	0	0	0	0	0	0	0	1	1	2	0	2	0	2	0	1	0	0	0	0	0	0	0	0	0	0	0	0	0	0	0	0	0	0	0	0	0	0	0	0	0	0	0	0	0
P02(PS)	0	0	0	0	0	0	0	0	0	0	0	0	0	1	0	0	1	1	1	0	0	1	1	4	1	1	1	1	0	1	0	0	0	0	0	0	0	1	0	0	0	0	1	0	0	0	0	1	0
P03(PS)	0	0	0	0	0	0	0	0	0	0	0	0	0	0	0	0	0	0	0	0	0	0	0	1	1	1	1	0	0	0	0	0	0	0	0	0	0	0	0	0	0	0	0	0	0	0	0	0	0
P04(SAD)	0	0	0	0	0	0	0	0	0	0	0	0	0	0	1	0	0	0	0	7	5	1	5	0	1	0	0	0	0	0	0	0	0	0	0	0	0	0	0	0	0	0	0	0	0	0	0	0	0
S01(PS)	0	0	0	0	0	0	1	3	5	2	8	6	6	8	2	3	2	0	2	2	1	0	0	0	0	0	0	0	0	0	0	0	0	0	0	0	0	0	0	0	0	0	0	1	0	0	0	0	0
S02(PS)	0	0	0	0	0	0	0	0	0	0	1	1	7	4	2	9	0	1	0	2	2	0	0	0	0	0	0	0	0	0	0	0	0	0	0	0	0	0	0	0	0	0	0	0	0	1	0	0	0
S03(PS)	0	0	1	0	0	0	0	0	0	0	1	2	9	5	4	2	3	3	2	4	2	0	0	0	0	0	0	0	0	0	1	0	0	0	0	0	0	0	0	0	0	0	0	0	0	0	0	0	0
S04(PS)	0	0	0	0	0	0	0	0	0	0	0	0	0	0	0	0	1	2	0	1	0	0	0	0	0	0	0	0	0	0	0	0	0	0	0	0	0	0	0	0	0	0	0	0	0	0	0	0	0
S05(PS)	0	0	0	0	0	0	0	0	0	0	0	0	0	0	0	0	3	1	2	4	3	0	1	1	1	0	0	0	0	0	1	0	0	0	0	0	0	0	0	0	0	0	0	0	0	0	0	0	0
S06(PS)	0	0	0	0	0	0	0	0	0	0	0	0	0	0	0	0	1	0	2	2	2	2	5	0	0	0	0	0	0	0	0	0	0	0	0	0	0	0	3	0	0	0	0	0	0	0	0	0	0
S07(PS)	0	0	0	0	0	0	0	1	0	0	0	0	0	0	0	0	1	0	2	1	3	3	5	2	1	0	0	1	0	0	0	0	0	0	0	0	0	1	0	0	0	0	0	0	0	0	0	0	0
S08(PS)	0	0	0	0	0	0	0	0	0	0	0	0	0	0	0	0	0	0	0	0	0	0	0	1	0	3	1	1	1	0	0	0	0	0	0	0	0	0	0	0	0	0	0	0	0	0	0	0	0
S09(PS)	0	0	1	0	0	0	0	0	0	0	0	0	0	0	0	0	0	0	0	1	0	0	1	2	1	7	8	6	2	5	1	0	1	2	0	0	0	0	0	0	0	0	0	0	0	0	0	0	0
S10(PS)	0	0	0	0	0	0	0	0	0	0	0	0	0	0	0	0	0	0	0	0	0	0	0	0	1	0	6	8	3	7	6	2	5	0	0	0	0	0	0	0	0	0	0	0	0	0	0	0	0
S11(PS)	0	0	0	0	0	0	0	0	0	0	0	0	0	0	0	0	0	0	0	0	0	0	0	1	0	0	3	1	0	9	6	4	4	5	4	3	0	0	0	0	0	0	0	0	0	0	0	0	0
S12(PS)	0	0	0	0	0	0	0	0	0	0	0	0	0	0	0	0	0	0	0	0	0	0	0	0	0	0	0	0	0	4	1	0	2	1	4	2	0	0	0	0	0	0	0	0	0	0	0	0	0
S13(PS)	0	0	0	0	0	0	0	0	0	0	0	0	0	0	0	0	0	0	0	0	0	0	0	0	0	0	0	0	0	1	2	1	1	0	0	1	0	0	1	0	0	0	0	0	0	0	0	0	0
[truncated: 6 more columns]

## Sheet: AOTUv1B_group
	18 ALH	20 ALH	22 ALH	24 ALH	26 ALH	28 ALH	30 ALH	32 ALH	34 ALH	36 ALH	38 ALH	40 ALH	42 ALH	44 ALH	46 ALH	48 ALH	50 ALH	52 ALH	54 ALH	56 ALH	58 ALH	60 ALH	62 ALH	64 ALH	66 ALH	68 ALH	70 ALH	72 ALH	74 ALH	76 ALH	78 ALH	80 ALH	82 ALH	84 ALH	22 BPF	20 BPF	18 BPF	16 BPF	14 BPF	12 BPF	10 BPF	8 BPF	6 BPF	4 BPF	2 BPF	0 BPF	0 APF	2 APF	4 APF
PS	0	0	2	0	0	0	1	4	5	2	10	10	23	20	9	16	12	10	11	25	18	7	18	12	7	12	20	18	6	27	18	7	13	8	8	6	0	2	4	0	0	0	1	1	0	1	0	1	0
[truncated: 6 more columns]

## Sheet: AOTUv3A_type
	18 ALH	20 ALH	22 ALH	24 ALH	26 ALH	28 ALH	30 ALH	32 ALH	34 ALH	36 ALH	38 ALH	40 ALH	42 ALH	44 ALH	46 ALH	48 ALH	50 ALH	52 ALH	54 ALH	56 ALH	58 ALH	60 ALH	62 ALH	64 ALH	66 ALH	68 ALH	70 ALH	72 ALH	74 ALH	76 ALH	78 ALH	80 ALH	82 ALH	84 ALH	22 BPF	20 BPF	18 BPF	16 BPF	14 BPF	12 BPF	10 BPF	8 BPF	6 BPF	4 BPF	2 BPF	0 BPF	0 APF	2 APF	4 APF
H01(LAL)	0	1	1	4	6	7	7	2	1	0	0	1	0	0	0	0	0	0	1	0	0	0	0	0	0	0	0	0	0	0	0	0	0	0	0	0	0	0	0	0	0	0	0	0	0	0	0	0	0
H02(LAL)	0	0	0	0	1	0	0	0	0	0	0	2	1	2	1	3	3	5	1	1	0	0	0	0	0	0	0	0	0	1	1	0	0	0	0	2	0	0	0	0	0	0	0	0	0	1	0	0	0
H03(LAL)	0	0	0	0	0	0	0	0	0	0	0	0	0	0	0	0	0	2	1	1	0	0	0	0	0	0	0	1	0	0	0	0	0	1	0	0	0	0	0	0	0	0	0	0	0	0	0	0	0
H04(LAL)	0	0	0	0	0	0	0	0	0	0	0	0	0	0	0	1	0	1	1	1	0	0	0	0	0	0	0	0	0	0	0	0	0	0	0	0	0	0	0	0	0	0	0	0	0	0	0	0	0
H05(LAL)	0	0	0	0	0	0	0	0	0	0	0	0	0	1	0	0	6	7	6	9	5	1	0	0	1	0	0	0	0	0	0	0	0	0	0	0	0	0	0	1	0	0	0	0	0	0	0	0	0
H06(LAL)	0	0	0	0	0	0	0	0	0	0	0	0	0	0	0	0	0	1	1	0	2	2	0	0	0	0	0	0	0	0	0	0	0	0	0	0	0	1	0	0	0	0	0	0	0	0	0	0	0
H07(LAL)	0	0	0	0	0	0	0	0	0	0	0	0	0	1	0	0	0	0	1	0	0	0	0	0	1	0	1	1	2	7	3	0	1	0	0	0	0	0	0	0	0	0	0	0	0	0	0	0	0
H08(LAL)	0	1	0	0	0	1	0	0	0	1	0	0	0	0	0	0	0	0	0	0	0	0	0	0	0	3	9	16	34	25	20	15	16	10	1	1	0	0	0	1	0	2	0	1	0	0	0	1	1
H09(LAL)	0	0	0	0	0	0	0	0	0	0	0	0	0	0	0	0	0	0	0	0	0	0	0	0	0	1	2	4	5	13	5	4	7	4	0	0	0	0	0	0	0	0	0	0	0	1	0	0	0
H10(PS)	0	0	1	2	5	6	4	5	2	6	2	2	4	1	0	0	0	0	0	0	0	0	0	0	0	0	0	0	0	0	0	0	0	0	0	0	0	0	0	0	0	0	0	0	0	0	0	0	0
H11(PS)	0	0	0	0	1	1	2	6	4	10	11	11	3	4	2	6	0	2	1	1	2	2	0	0	0	0	0	0	0	0	0	0	0	0	0	0	0	0	0	0	0	0	0	0	0	0	0	0	0
H12(PS)	0	1	0	0	0	0	0	0	0	1	3	2	2	2	3	7	1	2	0	0	1	0	0	0	0	0	0	0	0	0	0	0	0	0	0	0	0	0	0	0	0	0	0	0	0	0	0	0	0
H13(PS)	0	0	0	0	0	0	0	0	0	0	0	0	0	0	0	0	0	0	0	0	1	0	0	0	0	0	0	0	0	2	1	2	1	5	14	12	17	12	5	16	10	11	5	3	2	0	0	0	0
H14(PS*)	0	0	0	0	2	1	3	4	2	2	3	2	0	4	0	1	0	0	0	0	0	0	0	0	0	0	0	0	0	0	0	0	0	0	0	0	0	0	0	0	0	0	0	0	0	0	0	0	0
H15(PLP)	0	0	0	0	3	0	0	5	4	3	3	0	2	1	0	0	1	0	0	0	0	0	0	0	0	0	0	0	0	0	0	0	0	0	0	0	0	0	0	0	0	0	0	0	0	0	0	0	0
H16(ICLc)	0	0	0	0	0	0	0	0	0	1	0	0	0	0	0	0	0	0	1	9	6	6	10	13	14	8	7	7	3	1	2	0	1	1	1	0	1	0	0	0	2	0	0	0	1	0	0	0	0
H17(ICLc)	0	0	0	0	0	0	0	0	0	0	0	0	0	0	0	0	0	0	0	0	0	0	1	7	7	10	9	7	13	2	3	2	0	0	0	0	0	0	0	0	0	0	0	0	0	0	0	0	0
H18(SPSc)	0	0	0	0	0	0	0	0	0	1	0	0	0	0	0	0	0	0	0	0	0	0	0	0	0	0	0	0	0	1	5	8	4	12	2	3	1	2	0	0	0	0	0	0	0	0	0	1	0
T01(PS)	0	0	0	0	0	0	0	0	0	0	0	0	0	0	0	0	3	1	2	10	7	3	6	2	1	0	0	0	0	0	0	0	0	0	0	1	0	0	0	0	0	0	0	0	0	0	0	0	0
T02(PS)	0	0	0	0	0	0	0	0	0	0	1	0	0	0	0	0	2	0	3	7	5	11	9	2	3	0	1	0	0	0	2	0	0	0	0	0	0	1	0	1	0	0	0	1	0	0	0	0	1
T03(PS)	0	0	0	0	0	0	0	0	0	0	0	0	0	0	0	0	0	0	0	0	0	0	0	0	0	0	0	0	0	0	0	0	0	0	0	0	0	0	0	1	0	0	0	0	0	0	0	0	0
T04(ICL)	0	0	0	0	0	0	0	0	1	0	0	0	0	0	0	0	0	0	2	1	1	2	1	1	1	1	0	0	0	0	0	0	0	0	0	0	0	0	0	0	0	0	0	0	0	0	0	0	0
[truncated: 6 more columns]

## Sheet: AOTUv3A_group
	18 ALH	20 ALH	22 ALH	24 ALH	26 ALH	28 ALH	30 ALH	32 ALH	34 ALH	36 ALH	38 ALH	40 ALH	42 ALH	44 ALH	46 ALH	48 ALH	50 ALH	52 ALH	54 ALH	56 ALH	58 ALH	60 ALH	62 ALH	64 ALH	66 ALH	68 ALH	70 ALH	72 ALH	74 ALH	76 ALH	78 ALH	80 ALH	82 ALH	84 ALH	22 BPF	20 BPF	18 BPF	16 BPF	14 BPF	12 BPF	10 BPF	8 BPF	6 BPF	4 BPF	2 BPF	0 BPF	0 APF	2 APF	4 APF
CL	0	0	0	0	0	0	0	0	1	1	0	0	0	0	0	0	0	0	3	10	7	8	12	21	22	19	16	14	16	3	5	2	1	1	1	0	1	0	0	0	2	0	0	0	1	0	0	0	0
LAL	0	2	1	4	7	8	7	2	1	1	0	3	1	4	1	4	9	16	12	12	7	3	0	0	2	4	12	22	41	46	29	19	24	15	1	3	0	1	0	2	0	2	0	1	0	2	0	1	1
PLP	0	0	0	0	3	0	0	5	4	3	3	0	2	1	0	0	1	0	0	0	0	0	0	0	0	0	0	0	0	0	0	0	0	0	0	0	0	0	0	0	0	0	0	0	0	0	0	0	0
PS1	0	1	1	2	6	7	6	11	6	17	16	15	9	7	5	13	1	4	1	1	4	2	0	0	0	0	0	0	0	2	1	2	1	5	14	12	17	12	5	16	10	11	5	3	2	0	0	0	0
PS2	0	0	0	0	2	1	3	4	2	2	3	2	0	4	0	1	0	0	0	0	0	0	0	0	0	0	0	0	0	0	0	0	0	0	0	0	0	0	0	0	0	0	0	0	0	0	0	0	0
PS3	0	0	0	0	0	0	0	0	0	0	0	0	0	0	0	0	3	1	2	10	7	3	6	2	1	0	0	0	0	0	0	0	0	0	0	1	0	0	0	0	0	0	0	0	0	0	0	0	0
PS4	0	0	0	0	0	0	0	0	0	0	1	0	0	0	0	0	2	0	3	7	5	11	9	2	3	0	1	0	0	0	2	0	0	0	0	0	0	1	0	2	0	0	0	1	0	0	0	0	1
PS5	0	0	0	0	0	0	0	0	0	1	0	0	0	0	0	0	0	0	0	0	0	0	0	0	0	0	0	0	0	1	5	8	4	12	2	3	1	2	0	0	0	0	0	0	0	0	0	1	0
[truncated: 6 more columns]

## Sheet: AOTUv3B_type
	18 ALH	20 ALH	22 ALH	24 ALH	26 ALH	28 ALH	30 ALH	32 ALH	34 ALH	36 ALH	38 ALH	40 ALH	42 ALH	44 ALH	46 ALH	48 ALH	50 ALH	52 ALH	54 ALH	56 ALH	58 ALH	60 ALH	62 ALH	64 ALH	66 ALH	68 ALH	70 ALH	72 ALH	74 ALH	76 ALH	78 ALH	80 ALH	82 ALH	84 ALH	22 BPF	20 BPF	18 BPF	16 BPF	14 BPF	12 BPF	10 BPF	8 BPF	6 BPF	4 BPF	2 BPF	0 BPF	0 APF	2 APF	4 APF
M01(LAL)	0	0	0	0	1	1	1	4	2	2	4	2	0	3	1	0	0	0	1	0	2	0	0	0	0	0	0	0	0	0	0	0	0	0	0	0	0	0	0	0	0	0	0	0	0	0	0	0	0
M02(IB)	0	0	0	0	0	0	0	0	0	0	0	0	0	0	0	0	0	0	0	0	0	0	0	0	1	1	2	7	10	21	7	4	9	5	0	0	0	0	0	0	0	0	0	0	0	0	0	0	0
M03(IB)	0	1	0	0	0	0	0	0	0	2	0	0	0	1	0	0	1	0	0	0	0	0	0	0	0	0	1	0	8	6	14	9	9	5	1	2	0	0	0	0	0	1	0	0	0	2	0	1	0
M04(IB)	0	0	0	0	0	1	0	0	0	0	0	0	0	0	0	0	0	0	0	0	0	0	0	0	0	0	0	0	0	4	2	3	2	4	0	0	0	0	0	0	0	0	0	1	0	0	0	0	0
M05(IB)	0	0	0	0	0	0	0	0	0	0	0	0	0	0	0	0	0	0	0	0	0	0	0	0	0	0	0	0	0	1	3	4	3	5	1	3	0	0	0	0	0	0	0	0	0	0	0	0	0
M06(IB)	0	0	0	0	0	0	0	0	0	0	0	0	0	0	0	0	0	0	0	0	1	0	0	0	0	0	0	0	0	1	2	5	0	6	4	2	3	4	0	1	1	1	0	0	0	0	0	1	0
M07(IB)	0	0	0	0	1	0	0	0	0	0	0	0	0	0	0	0	0	0	0	0	0	0	0	0	0	0	0	0	0	2	0	1	1	2	10	3	6	8	6	19	7	7	2	7	8	2	5	5	6
P01(LAL)	0	1	1	4	6	7	7	2	1	0	0	1	0	0	0	0	0	0	1	0	0	0	0	0	0	0	0	0	0	0	0	0	0	0	0	0	0	0	0	0	0	0	0	0	0	0	0	0	0
P02(LAL)	0	0	1	2	4	3	1	1	1	2	0	1	1	0	0	0	0	0	0	0	0	0	0	0	0	0	0	0	0	0	0	0	0	0	0	0	0	0	0	0	0	0	0	0	0	0	0	0	0
P03(LAL)	0	0	0	0	1	3	3	4	1	4	2	1	3	1	0	0	0	0	0	0	0	0	0	0	0	0	0	0	0	0	0	0	0	0	0	0	0	0	0	0	0	0	0	0	0	0	0	0	0
P04(LAL)	0	0	0	0	3	0	0	5	4	3	3	0	2	1	0	0	1	0	0	0	0	0	0	0	0	0	0	0	0	0	0	0	0	0	0	0	0	0	0	0	0	0	0	0	0	0	0	0	0
P05(LAL)	0	0	0	0	2	1	3	4	2	2	3	2	0	4	0	1	0	0	0	0	0	0	0	0	0	0	0	0	0	0	0	0	0	0	0	0	0	0	0	0	0	0	0	0	0	0	0	0	0
P06(LAL)	0	0	0	0	0	0	1	1	0	3	1	3	2	0	0	1	0	0	0	0	0	0	0	0	0	0	0	0	0	0	0	0	0	0	0	0	0	0	0	0	0	0	0	0	0	0	0	0	0
P07(CRE)	0	1	0	0	0	0	0	1	2	7	10	8	3	4	5	11	1	4	0	1	2	2	0	0	0	0	0	0	0	0	0	0	0	0	0	0	0	0	0	0	0	0	0	0	0	0	0	0	0
P08(BU)	0	0	0	1	1	0	0	1	1	1	1	2	1	4	3	5	16	19	20	40	27	26	27	25	28	23	20	24	32	7	10	4	1	1	1	1	1	2	0	4	2	0	0	1	1	0	0	0	1
[truncated: 6 more columns]

## Sheet: AOTUv3B_group
	18 ALH	20 ALH	22 ALH	24 ALH	26 ALH	28 ALH	30 ALH	32 ALH	34 ALH	36 ALH	38 ALH	40 ALH	42 ALH	44 ALH	46 ALH	48 ALH	50 ALH	52 ALH	54 ALH	56 ALH	58 ALH	60 ALH	62 ALH	64 ALH	66 ALH	68 ALH	70 ALH	72 ALH	74 ALH	76 ALH	78 ALH	80 ALH	82 ALH	84 ALH	22 BPF	20 BPF	18 BPF	16 BPF	14 BPF	12 BPF	10 BPF	8 BPF	6 BPF	4 BPF	2 BPF	0 BPF	0 APF	2 APF	4 APF
BU	0	0	0	1	1	0	0	1	1	1	1	2	1	4	3	5	16	19	20	40	27	26	27	25	28	23	20	24	32	7	10	4	1	1	1	1	1	2	0	4	2	0	0	1	1	0	0	0	1
CRE	0	1	0	0	0	0	0	1	2	7	10	8	3	4	5	11	1	4	0	1	2	2	0	0	0	0	0	0	0	0	0	0	0	0	0	0	0	0	0	0	0	0	0	0	0	0	0	0	0
IB	0	1	0	0	1	1	0	0	0	2	0	0	0	1	0	0	1	0	0	0	1	0	0	0	1	1	3	7	18	35	28	26	24	27	16	10	9	12	6	20	8	9	2	8	8	4	5	7	6
LAL	0	1	2	6	17	15	16	21	11	16	13	10	8	9	1	2	1	0	2	0	2	0	0	0	0	0	0	0	0	0	0	0	0	0	0	0	0	0	0	0	0	0	0	0	0	0	0	0	0
[truncated: 6 more columns]

[truncated: 40 more sheets: AOTUv4A_type, AOTUv4A_group, AOTUv4B_type, AOTUv4B_group, CREa1A_type, CREa1A_group, CREa1B_type, CREa1B_group, CREa2A_type, CREa2A_group, CREa2B_type, CREa2B_group, FLAa1_type, FLAa1_group, FLAa2_type, FLAa2_group, FLAa3_type, FLAa3_group, LALv1A_type, LALv1A_group …]
