# Supplementary material for: Conservation and divergence of related neuronal lineages in the Drosophila central brain
Source: eLife. 2020 Apr 7;9:e53518. doi: 10.7554/eLife.53518 (PMC7173964; doi:10.7554/eLife.53518)
Supplement: Supplementary file 2. [file elife-53518-supp2.xlsx]

## Sheet: ALv1_annotation
Name	Group	Proximal	Distal
P01(SEG)	SEG	SEG	LH
P02(DA1)	AL	AL (DA1)	LH
P03(VL1)	AL	AL (VL1)	LH
P04(VA1lm)	AL	AL (VA1lm)	LH
P05(VA1d)	AL	AL (VA1d)	LH
P06(DM1,4)	AL	AL (DM1,DM4)	LH
P07(DL2d)	AL	AL (DL2d)	LH
P08(VL2p)	AL	AL (VL2p)	LH
P09(DP1l,VL2p)	AL	AL (DP1l,VL2p)	LH
P10(v)	AL	AL (DL6,VM2,VM5v,VM5d,VC2,VA3,VA7l,VA7m)	LH
P11(a)	AL	AL (DA1,DA3,DL3,DC1,DC4,VA1d,VA1lm)	LH
P12(a)	AL	AL (DL2v,DP1l,VL2a,VA1d,VA1lm)	LH
P13(dp,va)	AL	AL (DL2d,DL2v,DL5,DM4,DP1m,VC2,VA2,VA4)	LH
P14(p)	AL	AL (DL5,DL6,DM4,DC4,VC4,VM7,VM5d)	LH
P15(p)	AL	AL (DM2,DM3,DC4,VC4,VM7)	LH
P16(p)	AL	AL (DM5,DM6,DM2,DC4,VC3,VM2,VM7,VM5d)	LH
P17(a)	AL	AL (DA4l,DC1,VA1d,VA5)	LH
P18(da)	AL	AL (DA3,DA4l,DA4m,DC1,VC2)	LH
P19(v)	AL	AL (VM2,VM5v,VA2,VA3)	LH
P20(dp)	AL	AL (DM3,DC4,VC4,VM3,VA2)	LH
P21(d)	AL	AL (DC2,1,DM2,VM7)	LH
P22(d)	AL	AL (DM6,DC1,DC2,1,DL1,DL5,DL6,DC4)	LH
P23(dp)	AL	AL (DL2d,DM4,DP1m)	LH
P24(dp)	AL	AL (DL2d,DP1m)	LH
P25(dp)	AL	AL (DL2d,DM1,DP1m)	LH
P26(da)	AL	AL (DC3,VP2,VC1)	LH
P27(da)	AL	AL (DA4l,DC2,1,DC4,VC2)	LH
P28(da)	AL	AL (DA2,DA4l,1)	LH
P29(vp)	AL	AL (DC4,VC1,VC3,VC4,VL1,VM7)	LH
P30(vp,d)	AL	AL (DA1,DC3,DC4,VC3,VM2,VM7)	LH
P31(a)	AL	AL (DL2d,DL2v,VC2,VA2,VA4)	LH
P32(da)	AL	AL (DA2,DC1,1,DC4)	LH
P33(d)	AL	AL (DA3,DC1,DC2,DC4,VC4,VM7,VC2)	LH
P34(v)	AL	AL (DC2,1,DL2v,VC4,VM2,VM5v,VM5d,VC2,VA2,VA3,VA4)	LH
P35(p)	AL	AL (DL2v,VC1)	LH
P36(a)	AL	AL (DC1,DC3,VL2a,VA1d,VA1lm)	LH
P37(vp)	AL	AL (VP1,VP2,VP3,VC3,VM1)	LH
P38(p)	AL	AL (DC2,1,DL5,DC4,VC1,VC3,VM5d,VC2,VA4,VA5)	LH
P39(v)	AL	AL (DL5,DC4,VC1,VM5v,VM5d)	LH
P40(v)	AL	AL (DC4,VC1,VM7,VM5v,VM5d,VC2)	LH
P41(p)	AL	AL (DM6,DM4,DC4,VC4,VM7,VM5v)	LH
P42(d)	AL	AL (DM5,DC2,DM2,DC4,VM7)	LH
P43(SMP)	AL	AL (global)	LH SMP SIP CRE
P44(SLP)	AL	AL (DA2,DA3,DA4m,DC2,1,DC4,VC4)	LH SLP
P45(SEG)	AL	AL (DM4,DC4,VC4) SEG	LH
P46(calyx)	AL	AL (DM2,DC4,VC4,VM7)	LH calyx

## Sheet: AOTUv1 annotation N+
Name	Group	Proximal	Distal	Extra information
T01(LAL)	AOTU	AOTU SIP SMP	CREc LALc VESc
H01(CRE)	AOTU	AOTU SIP SMP	CRE(posterior) SIP	Tract : dorsal CRE
			CREc(posterior) SIPc
P01(CRE)	AOTU	AOTU SIP SMP	CRE(anterior)
P02(CRE)	AOTU	AOTU SIP SMP	CRE(dorsal posterior)
P03(CRE)	CRE	SMP	CRE(anterior) (SMP)
P04(CRE)	CRE	CRE(all) SMP (LAL)
P05(LAL)	LAL	CRE(anterior) SMP LAL VES		Less innervation in SMP
P06(LAL)	LAL	CRE(anterior) SMP LAL

## Sheet: AOTUv1 annotation N-
Name	Group		Extra information
S01(PS)	PS	LAL EPA VES SPS IPS CAN (SAD) (SEG)	Compare to S11, S9 more innervation in LAL, compare to B8 more innervation in IPS
S02(PS)	PS	(LAL) VES SPS IPS SEG
S03(PS)	PS	EPA VES SPS IPS IB CAN (ICL) (SEG)
S04(PS)	PS	SPS IPS SEG
S05(PS)	PS	EPA SPS IPS	Compare to S10 less innervation in IPS
S06(PS)	PS	VES IB SPS IPS SEG
S07(PS)	PS	(EPA) SPS IPS (SAD)
S08(PS)	PS	LAL EPA VES SPS IPS SEG
S09(PS)	PS	EPA SPS IPS	Compare toS5 more innervation in IPS
S10(PS)	PS	LAL EPA VES SPS IPS (SEG)	Compare to S11, S9 more innervation in LAL, compare to S1 more innervation in IPS
S11(PS)	PS	LAL EPA SPS IPS WED (SAD)
S12(PS)	PS	LAL EPA VES SPS IPS (SEG)
S13(PS)	PS	LAL EPA VES SPS IPS WED
P01(PS)	PS	SPS IPS PLP ICL
P02(PS)	PS	PLP ICL SPS IPS
P03(PS)	PS	LAL EPA ICL SPS IPS
P04(SAD)	PS	EPA SPS CAN SAD (WED)

## Sheet: AOTUv3 annotation N+ 
Name	Group	Proximal		Distal		Extra information
H01(LAL)	LAL	LAL EPA		SPS IPS (PLP) SEG
		LALc EPAc (IPSc)
H02(LAL)	LAL	LAL VES EPA SPS				Unique angle in SPSc
		LALc VESc SPSc
H03(LAL)	LAL	LAL		AOTU
		LALc
H04(LAL)	LAL	LAL CRE
		LALc
H05(LAL)	LAL	LAL CRE (WED)		AOTU
		LALc
H06(LAL)	LAL	LAL CRE (WED)
		LALc
H07(LAL)	LAL	LAL VES EPA SPS
		LALc
H08(LAL)	LAL	LAL VES EPA SPS
		LALc VESc SPSc
H09(LAL)	LAL	LAL (VES)
		LALc (VESc)
H10(PS)	PS1	AOTU	LAL EPA (WED)	SPS IPS
				SPSc (IPSc)
H11(PS)	PS1	AOTU	LAL	SPS IPS
				SPSc (IPSc)
H12(PS)	PS1	AOTU	LALc	SPS IPS
				SPSc (IPSc)
H13(PS)	PS1	LAL EPA VES		SPS (IPS)
				SPSc (IPSc)
H14(PS*)	PS2	LAL EPA (SEG)		SPS IPS
				SPSc
H15(PLP)	PLP	AOTU (SLP)		PLP SPS
				PLPc
H16(ICLc)	CL	AOTU (SLP)	LAL (EPA)	ICLc
		LALc
H17(ICLc)	CL	LAL VES (EPA)		ICLc
		LALc
H18(SPSc)	PS5	LAL VES EPA		SPSc
		LALc
T01(PS)	PS3	IPS WED SAD SEG		SPSc
T02(PS)	PS4	(IPS) SAD (SEG)		SPSc (IPSc)		Innervation in posterior of SPSc
T03(PS)	PS4	AOTU	LAL EPA	SAD (SEG)	SPSc (IPSc)
T04(ICLc)	CL	AOTU SCL (SLP)		LALc	ICLc

## Sheet: AOTUv3 annotation N-
Name	Group	Proximal	Distal		Extra information
M01(LAL)	LAL	AOTU SIP SMP	CRE LAL	ATL IB (SPS)
				ATLc Ibc
M02(IB)	IB	AOTU SIP	SMP IB
			SMPc IBc
M03(IB)	IB	AOTU	(AOTU) SIP SMP IB
			AOTUc SIPc SMPc IBc
M04(IB)	IB	AOTU	(AOTU) SIP SMP IB
			AOTUc SIPc SMPc IBc
M05(IB)	IB	AOTU	(AOTU) SIP SMP IB SPS
			AOTUc SIPc SMPc Ibc SPSc
M06(IB)	IB	AOTU SIP SMP	IB SPS
			IBc SPSc
M07(IB)	IB	AOTU SIP SMP CRE	ATL IB
			ATLc Ibc
P01(LAL)	LAL	AOTU	LAL (WED)
P02(LAL)	LAL	AOTU (SIP)	LAL VES SPS		Innervation in SPS extend to posterior edge
P03(LAL)	LAL	AOTU (SIP) (SMP)	LAL VES SPS
P04(LAL)	LAL	AOTU SIP SMP	LAL VES (SPS)
P05(LAL)	LAL	AOTU SIP SMP	LAL VES CRE
P06(LAL)	LAL	AOTU SIP SMP	LAL (CRE)
P07(CRE)	CRE	AOTU	CRE
P08(BU)	BU	AOTU	BU(s)

## Sheet: AOTUv4 annotation N+
Name	Group	Proximal	Distal	extra information
P01(SP)	SP	SLP SIP SMP		Major dendrite: SIP
P02(SP)	SP	SLP SIP SMP (SMPc)		Major dendrite: SMP extend to midline
M01(FB)	CX	FB(layer 8 top)	SLP
M02(FB)	CX	FB(layer 8)	SLP SIP SMP CRE(minor)	Major dendrite: SMP
M03(FB)	CX	FB(layer 6)	SLP SIP SMP CRE(posterior)
M04(FB)	CX	FB(layer 4(5))	SMP CRE(anterior&dorsal)
M05(FB)	CX	FB(layer 6)	SLP SIP SMP CRE(posterior&dorsal)
M06(FB)	CX	FB(layer 7)	SLP SIP SMP CRE(minor)
M07(FB)	CX	FB(layer 5(6))	SMP CRE(posterior&dorsal)
M08(FB)	CX	FB(layer 7)	SLP CRE(posterior)
M09(FB)	CX	FB(layer 6)	SMP CRE(posterior)
M10(FB)	CX	FB(layer 8)	SLP SIP SMP CRE(minor)	Major dendrite: SIP
M11(FB)	CX	FB(layer 6)	SIP SMP CRE(posterior)
M12(FB)	CX	FB(layer 6)	SIP SMP CRE(posterior dorsal)
M13(FB)	CX	FB(layer 5)	SMP CRE(posterior&dorsal)
M14(FB)	CX	FB(layer 4)	SMP CRE(posterior)
M15(FB)	CX	FB(layer 4)	SMP CRE(all)
M16(FB)	CX	FB(layer 4)	SMP CRE(anterior) LAL	Major dendrite: CRE
M17(FB)	CX	FB(layer 5)	SMP CRE(all)	Major dendrite: CRE
M18(FB)	CX	FB(layer 8)	SLP SIP SMP CRE(posterior dorsal)

## Sheet: AOTUv4 annotation N-
Name	Group	Proximal	Distal	Extra information
H01(LAL)	LAL	AOTU SLP SCL ICL SMP	LAL
			LALc
H02(LAL)	LAL	AOTU SIP SMP	LAL	More innervation in AOTU compare to A04(LAL)
			LALc
H03(LAL)	LAL	AOTU SIP SMP	LAL	More innervation in SMP A03(LAL)
			LALc
H04(LAL)	LAL	AOTU SIP SMP CRE(posterior)	LAL (CRE)
			LALc (CREc)
H05(VES)	VES	AOTU	LAL VES SPS
			LALc VESc SPSc
H06(CRE)	CRE	CRE SMP SIP AOTU	LAL CRE (SMP)
			LALc CREc (SMPc)
H07(CRE)	CRE	AOTU SIP SMP	(LAL) CRE
			(LALc) CREc
H08(CRE)	CRE	CRE SMP SIP (AOTU)	LAL CRE (SMP)	More condense in proximal compare to A07(CRE)
			LALc CREc (SMPc)
H09(CRE)	CRE	CRE SMP SIP SLP	LAL CRE (SMP)
			LALc CREc (SMPc)
H10(CRE)	CRE	CRE SMP SIP	CRE
			CREc
P01(CRE)	CRE	AOTU SIP LAL EPA	CRE (LAL)
P02(CRE)	CRE	AOTU SIP SMP	(CRE) LAL
P03(CRE)	CRE	AOTU SIP SMP	(CRE) LAL EPA SPS (AVLP)
P04(BU)	BU	AOTU	BU(i)
T01(VES)	VES	AOTU	LALc VESc SPSc	Innervation in whole AOTU2
T02(VES)	VES	AOTU	LALc VESc SPSc	Innervation in dorsal of AOTU2
T03(CRE)	CRE	CRE SMP SIP	CREc

## Sheet: CREa1 annotation N+
Na+A:Dme	Group	Proximal	Distal
H01(𝒶1)	PAM	SMP SIP SLP	MB-LB(𝒶1)
			MB-LBc(𝒶1)
H02(ℬ1ped)	PAM	SMP SIP SLP	MB-LB(ℬ1ped)
			MB-LBc(ℬ1ped)
H03(ℬ1)	PAM	SMP SIP SLP	MB-LB(ℬ1)
			MB-LBc(ℬ1)
H04(ℬ2)	PAM	SMP SIP SLP	MB-LB(ℬ2?)
			MB-LBc(ℬ2?)
H05(ℬ2)	PAM	SLP	MB-LB(ℬ2?)
			MB-LBc(ℬ2?)
H06(𝓇5)	PAM	SMP	MB-LB(𝓇5)
			MB-LBc(𝓇5)
H07(ℬ'2r5)	PAM	SMP	MB-LB(ℬ'2&r5)
			MB-LBc(ℬ'2&r5)
H08(ℬ'2a)	PAM	SMP (SIP)	MB-LB(ℬ'2a)
			MB-LBc(ℬ'2a)
H09(ℬ'2m)	PAM	SMP	MB-LB(ℬ'2m)
			MB-LBc(ℬ'2m)
H10(𝓇4)	PAM	SMP CRE(dorsal)	MB-LB(𝓇4)
			MB-LBc(𝓇4)
H11(ℬ'2p)	PAM	CRE(dorsal) SMP	MB-LB(ℬ'2p)
			MB-LBc(ℬ'2p)
H12(ℬ'2m)	PAM	CRE(dorsal&posterior) SMP (SIP)	MB-LB(ℬ'2m)
			MB-LBc(ℬ'2m)
H13(ℬ'1m)	PAM	CRE(posterior&dorsal minor) SMP (SIP) (SLP) (AOTU)	MB-LB(ℬ'1m)
			MB-LBc(ℬ'1m)
H14(ℬ'1ap)	PAM	CRE(posterior&dorsal minor) SMP (SIP)	MB-LB(ℬ'1ap)
			MB-LBc(ℬ'1ap)
H15(𝓇3)	PAM	CRE(anterior&dorsal minor&posterior minor) (SMP)	MB-LB(𝓇3)
			MB-LBc(𝓇3)
H16(𝓇4)	PAM	CRE(anterior&dorsal&ventral&posterior variety) (SMP) (LAL)	MB-LB(𝓇4)
			MB-LBc(𝓇4)
H17(𝓇4<𝓇2)	PAM	CRE(anterior minor&dorsal minor) (SMP) (LAL)	MB-LB(𝓇4<𝓇2)
			MB-LBc(𝓇4<𝓇2)
H18(𝓇4<𝓇1𝓇2)	PAM	CRE(anterior minor&dorsal minor) (SMP) (LAL)	MB-LB(𝓇4<𝓇1𝓇2)
			MB-LBc(𝓇4<𝓇1𝓇2)
H19(𝓇4/5)	PAM	CRE(anterior&ventral minor) SMP	MB-LB(𝓇4/5)
			MB-LBc(𝓇4/5)
H20(𝓇5)	PAM	SMP (CRE)	MB-LB(𝓇5)
			MB-LBc(𝓇5)
H21(ℬ'2m)	PAM	SMP CRE(dorsal)	MB-LB(ℬ'2m)
			MB-LBc(ℬ'2m)
H22(ℬ2)	PAM	SMP CRE(dorsal)	MB-LB(ℬ2)
			MB-LBc(ℬ2)
H23(ℬ2ℬ'2)	PAM	SMP CRE(dorsal)	MB-LB(ℬ2ℬ'2)
			MB-LBc(ℬ2ℬ'2)
M01(FB)	CX	CRE(posterior ventral) LAL	FB
T01(IB)	IB	CRE(ventral&anterior minor) LAL	SMPc ATLc Ibc

## Sheet: CREa1 annotation N-
Name	Group	Proximal		Distal
H01(/SLPc)	SLP	CRE(ventral&posterior) (SMP)	VES FLA	SLPc (SIPc)
			VESc FLAc
P01(LO)	LO	VESc FLAc WEDc SADc SEGc AVLPc (PVLPc)		SPSc Ibc PLPc ICLc SLPc SCLc LOc
P02(VLP)	VLP	VESc (FLAc) SADc SEGc IPSc		WEDc PLPc AVLPc PVLPc (SCLc) (ICLc) SPSc
P03(VLP)	VLP	VESc WEDc SADc SEGc		(LHc) (PLPc) AVLPc PVLPc
P04(LH)	LH	WEDc SPSc (IPSc) LALc VESc SADc SEGc		CREx SMPc SIPc SLPc LHc PLPc
P05(SLP)	SLP	VESc FLAc PRWc SADc SEGc SEG		(SIP) SLP (LH)
P06(SLP)	SLP	PRWc SEGc		(SIP) SLP (LH)
P07(SLP)	SLP	PRWc SEGc		(SIP) SLP LH
P08(SLP)	SLP	VESc FLAc SADc		SLPc (SIPc)

## Sheet: CREa2 annotation N+
Name on birth	Group	Proximal	Distal
H01(𝒶1)	PAM	SMP SIP SLP	MB-LB(𝒶1)
			MB-LBc(𝒶1)
H02(ℬ1ped)	PAM	SMP SIP SLP	MB-LB(ℬ1ped)
			MB-LBc(ℬ1ped)
H03(ℬ1)	PAM	SMP SIP SLP	MB-LB(ℬ1)
			MB-LBc(ℬ1)
H04(ℬ2)	PAM	SMP SIP SLP	MB-LB(ℬ1)
			MB-LBc(ℬ1)
H05(ℬ2)	PAM	SLP	MB-LB(ℬ1)
			MB-LBc(ℬ1)
H06(𝓇5)	PAM	SMP	MB-LB(𝓇5)
			MB-LBc(𝓇5)
H07(ℬ'2r5)	PAM	SMP	MB-LB(ℬ'2&r5)
			MB-LBc(ℬ'2&r5)
H08(ℬ'2a)	PAM	SMP (SIP)	MB-LB(ℬ'2a)
			MB-LBc(ℬ'2a)
H09(ℬ'2m)	PAM	SMP	MB-LB(ℬ'2m)
			MB-LBc(ℬ'2m)
H10(𝓇4)	PAM	SMP CRE(dorsal)	MB-LB(𝓇4)
			MB-LBc(𝓇4)
H11(ℬ'2p)	PAM	CRE(dorsal) SMP	MB-LB(ℬ'2p)
			MB-LBc(ℬ'2p)
H12(ℬ'2m)	PAM	CRE(dorsal&posterior) SMP (SIP)	MB-LB(ℬ'2m)
			MB-LBc(ℬ'2m)
H13(ℬ'1m)	PAM	CRE(posterior&dorsal minor) SMP (SIP) (SLP) (AOTU)	MB-LB(ℬ'1m)
			MB-LBc(ℬ'1m)
H14(ℬ'1ap)	PAM	CRE(posterior&dorsal minor) SMP (SIP)	MB-LB(ℬ'1ap)
			MB-LBc(ℬ'1ap)
H15(𝓇3)	PAM	CRE(anterior&dorsal minor&posterior minor) (SMP)	MB-LB(𝓇3)
			MB-LBc(𝓇3)
H16(𝓇4)	PAM	CRE(anterior&dorsal&ventral&posterior variety) (SMP) (LAL)	MB-LB(𝓇4)
			MB-LBc(𝓇4)
H17(𝓇4<𝓇2)	PAM	CRE(anterior minor&dorsal minor) (SMP) (LAL)	MB-LB(𝓇4<𝓇2)
			MB-LBc(𝓇4<𝓇2)
H18(𝓇4<𝓇1𝓇2)	PAM	CRE(anterior minor&dorsal minor) (SMP) (LAL)	MB-LB(𝓇4<𝓇1𝓇2)
			MB-LBc(𝓇4<𝓇1𝓇2)
H19(𝓇4/5)	PAM	CRE(anterior&ventral minor) SMP	MB-LB(𝓇4/5)
			MB-LBc(𝓇4/5)
H20(𝓇5)	PAM	SMP (CRE)	MB-LB(𝓇5)
			MB-LBc(𝓇5)
H21(ℬ'2m)	PAM	SMP CRE(dorsal)	MB-LB(ℬ'2m)
			MB-LBc(ℬ'2m)
H22(ℬ2)	PAM	SMP CRE(dorsal)	MB-LB(ℬ2)
			MB-LBc(ℬ2)
H23(ℬ2ℬ'2)	PAM	SMP CRE(dorsal)	MB-LB(ℬ2ℬ'2)
			MB-LBc(ℬ2ℬ'2)
M01(FB)	CX	CRE(posterior ventral) LAL	FB

[truncated: 15 more sheets: CREa2 annotation N-, FLAa1 annotation type, FLAa2 annotation type, FLAa3 annotation type, LALv1 annotation N+ type, LALv1 annotation N- type, SLPpm3 annotation type, SMPad1 annotation type, SMPp&v1 annotation N+, SMPp&v1 annotation N-, VESa1 annotation type, VESa2 annotation type, VLPa2 annotation type, WEDa1 annotation type, WEDd1 annotation type]
